# Supplementary material for: WE3DS: An RGB-D Image Dataset for Semantic Segmentation in Agriculture
Source: MDPI journal article supplement (doi:10.3390/s23052713), 2023-03-01
Supplement: s1 [file s1]

# Supplementary Materials: WE3DS: An RGB-D Image Dataset for Semantic Segmentation in Agriculture

Florian Kitzler <sup>1</sup>, Norbert Barta <sup>1</sup>, Reinhard W. Neugschwandtner <sup>2</sup>, Andreas Gronauer <sup>1</sup> and Viktoria Motsch <sup>1,\*</sup>

**Table S1.** Plant species used in the field trials with their plant ID, english names (US) and encoded identifier used by the European and Mediterranean Plant Protection Organization (EPPO).

| Plant ID | EPPO Code | Name (US)              | Binomial Name                                                     | Type |
|----------|-----------|------------------------|-------------------------------------------------------------------|------|
| 1        | VICFX     | Broad bean             | <i>Vicia faba</i>                                                 | crop |
| 2        | SPRAR     | Corn spurry            | <i>Spergula arvensis</i>                                          | weed |
| 3        | AMARE     | Red-root amaranth      | <i>Amaranthus retroflexus</i>                                     | weed |
| 4        | FAGES     | Common buckwheat       | <i>Fagopyrum esculentum</i>                                       | crop |
| 5        | PIBSX     | Pea                    | <i>Pisum sativum</i>                                              | crop |
| 6        | DIGSA     | Red fingergrass        | <i>Digitaria sanguinalis</i>                                      | weed |
| 7        | AVEFA     | Common wild oat        | <i>Avena fatua</i>                                                | weed |
| 8        | CENCY     | Cornflower             | <i>Centaurea cyanus</i>                                           | weed |
| 9        | AGOGI     | Corn cockle            | <i>Agrostemma gitahgo</i>                                         | weed |
| 10       | ZEAMX     | Corn                   | <i>Zea mays</i>                                                   | crop |
| 11       | SLYMA     | Milk thistle           | <i>Silybum marianum</i>                                           | weed |
| 12       | BROSE     | Rye brome              | <i>Bromus secalinus</i>                                           | weed |
| 13       | GLXMA     | Soybean                | <i>Glycine max</i>                                                | crop |
| 14       | HELAN     | Sunflower              | <i>Helianthus annuus</i>                                          | crop |
| 15       | PLALA     | Narrow-leaved plantain | <i>Plantago lanceolata</i>                                        | weed |
| 16       | GERPU     | Small-flower geranium  | <i>Geranium pusillum</i>                                          | weed |
| 17       | BEAVA     | Sugar beet             | <i>Beta vulgaris</i> subsp. <i>vulgaris</i> var. <i>altissima</i> | crop |
| 18       | LACVI     | Acrid lettuce          | <i>Lactuca virosa</i>                                             | weed |
| 19       | POAAN     | Annual meadowgrass     | <i>Poa annua</i>                                                  | weed |
| 20       | BARVU     | Bittercress            | <i>Barbarea vulgaris</i>                                          | weed |
| 21       | CAPBP     | Blind weed             | <i>Capsella bursa-pastoris</i>                                    | weed |
| 22       | STEME     | Chickweed              | <i>Stellaria media</i>                                            | weed |
| 23       | GAETE     | Common hemp-nettle     | <i>Galeopsis tetrahit</i>                                         | weed |
| 24       | PAPRH     | Common poppy           | <i>Papaver rhoeas</i>                                             | weed |
| 25       | RANRE     | Creeping buttercup     | <i>Ranunculus repens</i>                                          | weed |
| 26       | CIRAR     | Creeping thistle       | <i>Cirsium arvense</i>                                            | weed |
| 27       | THLAR     | Field pennycress       | <i>Thlaspi arvense</i>                                            | weed |
| 28       | FUMOF     | Fumitory               | <i>Fumaria officinalis</i>                                        | weed |
| 29       | SETVI     | Green foxtail          | <i>Setaria viridis</i>                                            | weed |
| 30       | SSYOF     | Hedge mustard          | <i>Sisymbrium officinale</i>                                      | weed |
| 31       | VERHE     | Ivy-leaved speedwell   | <i>Veronica hederifolia</i>                                       | weed |
| 32       | POLPE     | Ladysthumb             | <i>Polygonum persicaria</i>                                       | weed |
| 33       | HORMU     | Mouse barley           | <i>Hordeum murinum</i>                                            | weed |
| 34       | MATMT     | Pinapple weed          | <i>Matricaria discoidea</i>                                       | weed |
| 35       | LAMPU     | Purple archangel       | <i>Lamium purpureum</i>                                           | weed |
| 36       | VLPMY     | Ratstail fescue        | <i>Vulpia myuros</i>                                              | weed |
| 37       | BROMO     | Soft brome             | <i>Bromus hordeaceus</i>                                          | weed |
| 38       | CHEAL     | White goosefoot        | <i>Chenopodium album</i>                                          | weed |
| 39       | VIOTR     | Wild pansy             | <i>Viola tricolor</i>                                             | weed |

| Distance [mm] | Depth Accuracy [mm] |             |
|---------------|---------------------|-------------|
|               | $b = 41$ mm         | $b = 51$ mm |
| 500           | 0.6                 | 0.5         |
| 550           | 0.7                 | 0.6         |
| 600           | 0.9                 | 0.7         |
| 650           | 1.0                 | 0.8         |
| 700           | 1.2                 | 0.9         |
| 750           | 1.3                 | 1.1         |
| 800           | 1.5                 | 1.2         |
| 850           | 1.7                 | 1.4         |
| 900           | 1.9                 | 1.6         |
| 950           | 2.1                 | 1.7         |
| 1000          | 2.4                 | 1.9         |

[illegible]

**Table S4.** Confusion matrix in percent for ESANet trained on RGB-D with input resolution of  $1024 \times 512$  pixels after 1307/1500 epochs.

|    | 0  | 1  | 2  | 3  | 4  | 5  | 6  | 7  | 8  | 9  | 10 | 11 | 12 | 13 | 14 | 15 | 16 | 17 |
|----|----|----|----|----|----|----|----|----|----|----|----|----|----|----|----|----|----|----|
| 0  | 99 | 12 | 49 | 34 | 21 | 48 | 45 | 67 | 36 | 30 | 18 | 13 | 40 | 17 | 11 | 46 | 59 | 23 |
| 1  | 0  | 86 | 0  | 0  | 0  | 0  | 0  | 0  | 0  | 0  | 0  | 0  | 0  | 0  | 5  | 0  | 0  | 0  |
| 2  | 0  | 0  | 17 | 0  | 0  | 0  | 0  | 0  | 0  | 0  | 0  | 0  | 0  | 0  | 0  | 0  | 0  | 0  |
| 3  | 0  | 0  | 0  | 63 | 0  | 0  | 0  | 0  | 0  | 0  | 0  | 0  | 0  | 0  | 0  | 0  | 0  | 0  |
| 4  | 0  | 0  | 0  | 0  | 78 | 0  | 0  | 0  | 0  | 0  | 0  | 0  | 0  | 0  | 0  | 0  | 0  | 0  |
| 5  | 0  | 0  | 0  | 0  | 0  | 50 | 0  | 0  | 0  | 0  | 0  | 0  | 0  | 0  | 0  | 0  | 0  | 0  |
| 6  | 0  | 0  | 0  | 0  | 0  | 0  | 54 | 0  | 0  | 0  | 0  | 0  | 0  | 0  | 0  | 0  | 0  | 0  |
| 7  | 0  | 0  | 0  | 0  | 0  | 0  | 0  | 31 | 0  | 0  | 0  | 0  | 0  | 0  | 0  | 3  | 0  | 0  |
| 8  | 0  | 0  | 0  | 1  | 0  | 0  | 0  | 0  | 56 | 0  | 0  | 0  | 1  | 0  | 0  | 0  | 0  | 0  |
| 9  | 0  | 0  | 0  | 0  | 0  | 0  | 0  | 0  | 3  | 67 | 0  | 0  | 2  | 0  | 0  | 12 | 0  | 3  |
| 10 | 0  | 0  | 0  | 0  | 0  | 0  | 0  | 0  | 0  | 0  | 80 | 0  | 0  | 0  | 0  | 0  | 0  | 0  |
| 11 | 0  | 0  | 0  | 0  | 0  | 0  | 0  | 0  | 0  | 0  | 0  | 86 | 0  | 0  | 0  | 0  | 0  | 0  |
| 12 | 0  | 0  | 0  | 0  | 0  | 0  | 0  | 0  | 0  | 0  | 0  | 0  | 55 | 0  | 0  | 0  | 0  | 0  |
| 13 | 0  | 0  | 0  | 0  | 0  | 0  | 0  | 0  | 0  | 0  | 0  | 0  | 0  | 80 | 1  | 0  | 0  | 0  |
| 14 | 0  | 0  | 0  | 0  | 0  | 0  | 0  | 0  | 0  | 0  | 0  | 0  | 0  | 1  | 80 | 0  | 0  | 0  |
| 15 | 0  | 0  | 31 | 0  | 0  | 0  | 0  | 0  | 0  | 0  | 0  | 0  | 0  | 0  | 0  | 36 | 0  | 0  |
| 16 | 0  | 0  | 0  | 0  | 0  | 0  | 0  | 0  | 0  | 0  | 0  | 0  | 0  | 0  | 0  | 0  | 38 | 0  |
| 17 | 0  | 0  | 0  | 0  | 0  | 0  | 0  | 0  | 0  | 0  | 0  | 0  | 0  | 0  | 0  | 0  | 0  | 68 |

**Table S5.** Confusion matrix in percent for ESANet trained on RGB-D with input resolution of  $640 \times 480$  pixels after 1415/1500 epochs.

|    | 0  | 1  | 2  | 3  | 4  | 5  | 6  | 7  | 8  | 9  | 10 | 11 | 12 | 13 | 14 | 15 | 16 | 17 |
|----|----|----|----|----|----|----|----|----|----|----|----|----|----|----|----|----|----|----|
| 0  | 99 | 16 | 45 | 32 | 28 | 53 | 39 | 67 | 45 | 42 | 26 | 17 | 46 | 23 | 17 | 51 | 60 | 26 |
| 1  | 0  | 81 | 0  | 0  | 0  | 0  | 0  | 0  | 0  | 0  | 0  | 0  | 0  | 3  | 4  | 0  | 0  | 0  |
| 2  | 0  | 0  | 9  | 0  | 0  | 0  | 0  | 0  | 0  | 0  | 0  | 0  | 0  | 0  | 0  | 0  | 0  | 0  |
| 3  | 0  | 0  | 0  | 67 | 0  | 0  | 0  | 0  | 0  | 0  | 0  | 0  | 0  | 0  | 0  | 0  | 0  | 0  |
| 4  | 0  | 0  | 0  | 0  | 69 | 0  | 0  | 0  | 0  | 0  | 0  | 0  | 0  | 0  | 0  | 0  | 0  | 0  |
| 5  | 0  | 0  | 1  | 0  | 0  | 38 | 0  | 0  | 0  | 0  | 0  | 0  | 0  | 0  | 0  | 0  | 0  | 0  |
| 6  | 0  | 0  | 6  | 0  | 0  | 0  | 60 | 0  | 0  | 0  | 0  | 0  | 0  | 0  | 0  | 0  | 0  | 0  |
| 7  | 0  | 0  | 0  | 0  | 0  | 0  | 0  | 22 | 0  | 0  | 0  | 0  | 0  | 0  | 0  | 0  | 0  | 0  |
| 8  | 0  | 0  | 0  | 0  | 0  | 0  | 0  | 1  | 36 | 0  | 0  | 0  | 5  | 0  | 0  | 4  | 4  | 0  |
| 9  | 0  | 0  | 15 | 0  | 0  | 4  | 0  | 0  | 11 | 52 | 0  | 0  | 3  | 0  | 1  | 2  | 2  | 2  |
| 10 | 0  | 0  | 0  | 0  | 0  | 0  | 0  | 2  | 0  | 0  | 69 | 0  | 0  | 0  | 0  | 0  | 0  | 0  |
| 11 | 0  | 0  | 0  | 0  | 0  | 0  | 0  | 0  | 1  | 0  | 0  | 82 | 0  | 0  | 1  | 0  | 0  | 0  |
| 12 | 0  | 0  | 0  | 0  | 0  | 0  | 0  | 0  | 0  | 0  | 0  | 0  | 43 | 0  | 0  | 0  | 0  | 0  |
| 13 | 0  | 0  | 0  | 0  | 0  | 0  | 0  | 0  | 0  | 0  | 0  | 0  | 0  | 68 | 0  | 0  | 0  | 0  |
| 14 | 0  | 1  | 0  | 0  | 0  | 0  | 0  | 0  | 0  | 1  | 0  | 0  | 0  | 3  | 71 | 0  | 0  | 0  |
| 15 | 0  | 0  | 20 | 0  | 0  | 0  | 0  | 3  | 0  | 0  | 0  | 0  | 0  | 0  | 0  | 37 | 0  | 0  |
| 16 | 0  | 0  | 0  | 0  | 0  | 0  | 0  | 1  | 0  | 0  | 0  | 0  | 0  | 0  | 0  | 0  | 28 | 0  |
| 17 | 0  | 0  | 0  | 0  | 0  | 1  | 0  | 0  | 3  | 2  | 0  | 0  | 0  | 0  | 0  | 1  | 1  | 67 |

**Table S6.** Confusion matrix in percent for ESANet trained on RGB with input resolution of  $1280 \times 960$  pixels after 1330/1500 epochs.

|    | 0  | 1  | 2  | 3  | 4  | 5  | 6  | 7  | 8  | 9  | 10 | 11 | 12 | 13 | 14 | 15 | 16 | 17 |
|----|----|----|----|----|----|----|----|----|----|----|----|----|----|----|----|----|----|----|
| 0  | 99 | 8  | 51 | 43 | 13 | 40 | 33 | 56 | 27 | 23 | 12 | 9  | 34 | 10 | 8  | 33 | 56 | 13 |
| 1  | 0  | 91 | 0  | 0  | 0  | 0  | 0  | 0  | 0  | 0  | 0  | 0  | 0  | 0  | 0  | 0  | 0  | 0  |
| 2  | 0  | 0  | 38 | 0  | 0  | 0  | 0  | 0  | 0  | 0  | 0  | 0  | 0  | 0  | 0  | 0  | 0  | 0  |
| 3  | 0  | 0  | 0  | 52 | 0  | 0  | 0  | 0  | 0  | 0  | 0  | 0  | 0  | 0  | 0  | 0  | 0  | 0  |
| 4  | 0  | 0  | 0  | 0  | 86 | 0  | 0  | 0  | 0  | 0  | 0  | 0  | 0  | 0  | 0  | 0  | 0  | 0  |
| 5  | 0  | 0  | 0  | 0  | 0  | 57 | 0  | 0  | 0  | 0  | 0  | 0  | 0  | 0  | 0  | 0  | 0  | 0  |
| 6  | 0  | 0  | 0  | 0  | 0  | 0  | 66 | 0  | 0  | 0  | 0  | 0  | 0  | 0  | 0  | 0  | 0  | 0  |
| 7  | 0  | 0  | 0  | 0  | 0  | 0  | 0  | 40 | 0  | 0  | 0  | 0  | 0  | 0  | 0  | 0  | 0  | 0  |
| 8  | 0  | 0  | 0  | 4  | 0  | 0  | 0  | 0  | 71 | 0  | 0  | 0  | 0  | 0  | 0  | 0  | 0  | 0  |
| 9  | 0  | 0  | 0  | 0  | 0  | 0  | 0  | 0  | 0  | 73 | 0  | 0  | 0  | 0  | 0  | 0  | 0  | 0  |
| 10 | 0  | 0  | 0  | 0  | 0  | 0  | 0  | 1  | 0  | 0  | 87 | 0  | 0  | 0  | 0  | 0  | 0  | 0  |
| 11 | 0  | 0  | 0  | 0  | 0  | 0  | 0  | 0  | 0  | 0  | 0  | 89 | 0  | 0  | 0  | 0  | 0  | 0  |
| 12 | 0  | 0  | 0  | 0  | 0  | 0  | 0  | 0  | 0  | 0  | 0  | 0  | 65 | 0  | 0  | 0  | 0  | 0  |
| 13 | 0  | 0  | 0  | 0  | 0  | 0  | 0  | 0  | 0  | 0  | 0  | 0  | 0  | 88 | 0  | 0  | 0  | 0  |
| 14 | 0  | 0  | 0  | 0  | 0  | 0  | 0  | 0  | 0  | 0  | 0  | 0  | 0  | 0  | 91 | 0  | 0  | 0  |
| 15 | 0  | 0  | 10 | 0  | 0  | 0  | 0  | 0  | 0  | 0  | 0  | 0  | 0  | 0  | 0  | 64 | 0  | 0  |
| 16 | 0  | 0  | 0  | 0  | 0  | 0  | 0  | 0  | 0  | 0  | 0  | 0  | 0  | 0  | 0  | 0  | 42 | 0  |
| 17 | 0  | 0  | 0  | 0  | 0  | 0  | 0  | 0  | 0  | 0  | 0  | 0  | 0  | 0  | 0  | 1  | 0  | 84 |

**Table S7.** Confusion matrix in percent for ESANet trained on RGB with input resolution of  $1024 \times 512$  pixels after 1352/1500 epochs.

|    | 0  | 1  | 2  | 3  | 4  | 5  | 6  | 7  | 8  | 9  | 10 | 11 | 12 | 13 | 14 | 15 | 16 | 17 |
|----|----|----|----|----|----|----|----|----|----|----|----|----|----|----|----|----|----|----|
| 0  | 99 | 12 | 49 | 30 | 21 | 49 | 31 | 54 | 37 | 28 | 21 | 15 | 42 | 18 | 13 | 47 | 59 | 21 |
| 1  | 0  | 84 | 0  | 0  | 0  | 0  | 0  | 0  | 0  | 0  | 0  | 0  | 0  | 0  | 2  | 0  | 0  | 0  |
| 2  | 0  | 0  | 15 | 0  | 0  | 0  | 0  | 0  | 0  | 0  | 0  | 0  | 0  | 0  | 0  | 0  | 0  | 0  |
| 3  | 0  | 0  | 0  | 69 | 0  | 0  | 0  | 0  | 0  | 0  | 0  | 0  | 0  | 0  | 0  | 0  | 0  | 0  |
| 4  | 0  | 0  | 0  | 0  | 78 | 0  | 0  | 0  | 0  | 0  | 0  | 1  | 0  | 0  | 1  | 0  | 0  | 1  |
| 5  | 0  | 0  | 7  | 0  | 0  | 50 | 0  | 0  | 0  | 0  | 0  | 0  | 0  | 0  | 0  | 0  | 0  | 0  |
| 6  | 0  | 0  | 0  | 0  | 0  | 0  | 24 | 0  | 0  | 0  | 0  | 0  | 0  | 0  | 0  | 0  | 0  | 0  |
| 7  | 0  | 0  | 0  | 0  | 0  | 0  | 0  | 38 | 0  | 0  | 0  | 0  | 0  | 0  | 0  | 5  | 0  | 0  |
| 8  | 0  | 0  | 0  | 0  | 0  | 0  | 19 | 0  | 50 | 0  | 0  | 0  | 11 | 0  | 0  | 3  | 3  | 0  |
| 9  | 0  | 0  | 1  | 0  | 0  | 0  | 0  | 0  | 8  | 61 | 0  | 0  | 2  | 0  | 0  | 13 | 0  | 2  |
| 10 | 0  | 0  | 0  | 0  | 0  | 0  | 24 | 6  | 0  | 0  | 76 | 0  | 0  | 0  | 0  | 5  | 0  | 1  |
| 11 | 0  | 0  | 0  | 0  | 0  | 0  | 0  | 0  | 0  | 0  | 0  | 81 | 0  | 0  | 0  | 0  | 0  | 0  |
| 12 | 0  | 0  | 0  | 0  | 0  | 0  | 0  | 0  | 0  | 0  | 0  | 0  | 43 | 0  | 0  | 1  | 0  | 0  |
| 13 | 0  | 0  | 0  | 0  | 0  | 0  | 0  | 0  | 0  | 0  | 0  | 0  | 0  | 79 | 3  | 1  | 0  | 0  |
| 14 | 0  | 1  | 0  | 0  | 0  | 0  | 0  | 0  | 0  | 3  | 0  | 0  | 0  | 0  | 77 | 0  | 0  | 0  |
| 15 | 0  | 0  | 24 | 0  | 0  | 0  | 0  | 0  | 0  | 0  | 0  | 0  | 0  | 0  | 0  | 20 | 0  | 0  |
| 16 | 0  | 0  | 0  | 0  | 0  | 0  | 0  | 0  | 0  | 0  | 0  | 0  | 0  | 0  | 0  | 0  | 33 | 0  |
| 17 | 0  | 0  | 0  | 0  | 0  | 0  | 0  | 0  | 1  | 1  | 0  | 0  | 0  | 0  | 0  | 1  | 1  | 70 |

**Table S8.** Confusion matrix in percent for ESANet trained on RGB with input resolution of  $640 \times 480$  pixels after 1195/1500 epochs.

|    | 0  | 1  | 2  | 3  | 4  | 5  | 6  | 7  | 8  | 9  | 10 | 11 | 12 | 13 | 14 | 15 | 16 | 17 |
|----|----|----|----|----|----|----|----|----|----|----|----|----|----|----|----|----|----|----|
| 0  | 99 | 15 | 46 | 30 | 28 | 57 | 24 | 70 | 45 | 35 | 28 | 20 | 52 | 23 | 16 | 60 | 66 | 26 |
| 1  | 0  | 83 | 0  | 0  | 0  | 2  | 0  | 0  | 0  | 7  | 0  | 0  | 0  | 1  | 5  | 0  | 0  | 0  |
| 2  | 0  | 0  | 14 | 0  | 0  | 0  | 0  | 0  | 0  | 0  | 0  | 0  | 0  | 0  | 0  | 0  | 0  | 0  |
| 3  | 0  | 0  | 0  | 56 | 0  | 0  | 0  | 0  | 0  | 0  | 0  | 0  | 0  | 0  | 0  | 0  | 0  | 0  |
| 4  | 0  | 0  | 0  | 0  | 67 | 0  | 0  | 0  | 0  | 0  | 1  | 1  | 0  | 0  | 0  | 0  | 0  | 1  |
| 5  | 0  | 0  | 4  | 1  | 0  | 37 | 0  | 0  | 0  | 0  | 0  | 0  | 0  | 0  | 0  | 0  | 1  | 0  |
| 6  | 0  | 0  | 1  | 0  | 0  | 0  | 75 | 0  | 0  | 0  | 0  | 0  | 0  | 0  | 0  | 0  | 0  | 0  |
| 7  | 0  | 0  | 0  | 0  | 0  | 0  | 0  | 24 | 0  | 0  | 0  | 0  | 0  | 0  | 0  | 0  | 0  | 0  |
| 8  | 0  | 0  | 1  | 9  | 0  | 0  | 0  | 1  | 32 | 0  | 0  | 0  | 7  | 0  | 0  | 3  | 5  | 1  |
| 9  | 0  | 0  | 0  | 0  | 0  | 0  | 0  | 0  | 15 | 34 | 0  | 0  | 14 | 0  | 0  | 20 | 1  | 2  |
| 10 | 0  | 0  | 0  | 0  | 0  | 0  | 0  | 1  | 0  | 0  | 68 | 0  | 0  | 0  | 0  | 0  | 0  | 2  |
| 11 | 0  | 0  | 0  | 0  | 0  | 0  | 0  | 0  | 1  | 0  | 0  | 73 | 0  | 0  | 0  | 0  | 0  | 0  |
| 12 | 0  | 0  | 0  | 0  | 0  | 0  | 0  | 0  | 0  | 0  | 0  | 0  | 24 | 0  | 0  | 1  | 0  | 0  |
| 13 | 0  | 0  | 0  | 0  | 1  | 0  | 0  | 0  | 0  | 4  | 0  | 0  | 0  | 69 | 0  | 0  | 1  | 0  |
| 14 | 0  | 0  | 0  | 0  | 0  | 0  | 0  | 0  | 0  | 15 | 0  | 1  | 0  | 4  | 77 | 0  | 0  | 0  |
| 15 | 0  | 0  | 31 | 0  | 0  | 0  | 0  | 1  | 0  | 0  | 0  | 0  | 0  | 0  | 0  | 12 | 0  | 0  |
| 16 | 0  | 0  | 0  | 0  | 0  | 0  | 0  | 0  | 0  | 0  | 0  | 0  | 0  | 0  | 0  | 0  | 20 | 0  |
| 17 | 0  | 0  | 0  | 0  | 0  | 0  | 0  | 0  | 2  | 1  | 0  | 0  | 0  | 0  | 0  | 0  | 1  | 63 |

**Table S9.** Confusion matrix in percent for ESANet trained on D with input resolution of  $1280 \times 960$  pixels after 1324/1500 epochs.

|    | 0  | 1  | 2  | 3  | 4  | 5  | 6  | 7  | 8  | 9  | 10 | 11 | 12 | 13 | 14 | 15 | 16 | 17 |
|----|----|----|----|----|----|----|----|----|----|----|----|----|----|----|----|----|----|----|
| 0  | 99 | 15 | 54 | 17 | 25 | 54 | 45 | 65 | 44 | 37 | 26 | 18 | 49 | 21 | 16 | 51 | 78 | 22 |
| 1  | 0  | 81 | 0  | 0  | 1  | 0  | 0  | 0  | 0  | 0  | 0  | 0  | 0  | 0  | 0  | 0  | 0  | 0  |
| 2  | 0  | 0  | 23 | 0  | 0  | 0  | 0  | 0  | 0  | 0  | 0  | 0  | 0  | 0  | 0  | 3  | 0  | 0  |
| 3  | 0  | 0  | 0  | 82 | 0  | 0  | 0  | 0  | 0  | 0  | 0  | 0  | 0  | 0  | 0  | 0  | 0  | 0  |
| 4  | 0  | 0  | 0  | 0  | 71 | 0  | 0  | 0  | 0  | 0  | 0  | 0  | 0  | 0  | 0  | 0  | 0  | 0  |
| 5  | 0  | 0  | 7  | 0  | 0  | 41 | 0  | 0  | 0  | 0  | 1  | 0  | 0  | 0  | 0  | 0  | 0  | 0  |
| 6  | 0  | 0  | 0  | 0  | 0  | 0  | 54 | 0  | 0  | 0  | 0  | 0  | 0  | 0  | 0  | 0  | 0  | 0  |
| 7  | 0  | 0  | 0  | 0  | 0  | 0  | 0  | 32 | 0  | 0  | 0  | 0  | 0  | 0  | 0  | 1  | 0  | 0  |
| 8  | 0  | 0  | 0  | 0  | 0  | 0  | 0  | 0  | 48 | 7  | 0  | 0  | 2  | 0  | 0  | 15 | 0  | 0  |
| 9  | 0  | 0  | 0  | 0  | 0  | 0  | 0  | 0  | 1  | 49 | 0  | 0  | 0  | 0  | 0  | 0  | 0  | 2  |
| 10 | 0  | 0  | 0  | 0  | 0  | 0  | 0  | 0  | 0  | 0  | 70 | 0  | 0  | 0  | 0  | 0  | 0  | 0  |
| 11 | 0  | 0  | 0  | 0  | 0  | 0  | 0  | 0  | 0  | 0  | 0  | 81 | 0  | 0  | 0  | 0  | 0  | 0  |
| 12 | 0  | 0  | 0  | 0  | 0  | 0  | 0  | 0  | 0  | 0  | 0  | 0  | 45 | 0  | 0  | 0  | 0  | 0  |
| 13 | 0  | 1  | 9  | 0  | 0  | 1  | 0  | 0  | 0  | 0  | 0  | 0  | 0  | 75 | 1  | 0  | 0  | 0  |
| 14 | 0  | 0  | 0  | 0  | 0  | 0  | 0  | 0  | 0  | 0  | 0  | 0  | 0  | 1  | 80 | 0  | 0  | 0  |
| 15 | 0  | 0  | 3  | 0  | 0  | 0  | 0  | 0  | 0  | 2  | 0  | 0  | 0  | 0  | 0  | 18 | 0  | 0  |
| 16 | 0  | 0  | 0  | 0  | 0  | 0  | 0  | 0  | 0  | 0  | 0  | 0  | 0  | 0  | 0  | 1  | 19 | 0  |
| 17 | 0  | 0  | 0  | 0  | 0  | 0  | 0  | 1  | 3  | 3  | 0  | 0  | 0  | 0  | 0  | 7  | 1  | 74 |

**Table S10.** Confusion matrix in percent for ESANet trained on D with input resolution of  $1024 \times 512$  pixels after 1087/1500 epochs.

|    | 0  | 1  | 2  | 3 | 4  | 5  | 6  | 7 | 8  | 9  | 10 | 11 | 12 | 13 | 14 | 15 | 16  | 17 |
|----|----|----|----|---|----|----|----|---|----|----|----|----|----|----|----|----|-----|----|
| 0  | 99 | 17 | 53 | 0 | 28 | 41 | 51 | 0 | 60 | 51 | 28 | 47 | 79 | 32 | 18 | 84 | 100 | 32 |
| 1  | 0  | 80 | 2  | 0 | 2  | 33 | 0  | 0 | 0  | 0  | 4  | 0  | 0  | 9  | 9  | 1  | 0   | 0  |
| 2  | 0  | 0  | 0  | 0 | 0  | 0  | 0  | 0 | 0  | 0  | 0  | 0  | 0  | 0  | 0  | 0  | 0   | 0  |
| 3  | 0  | 0  | 0  | 0 | 0  | 0  | 0  | 0 | 0  | 0  | 0  | 0  | 0  | 0  | 0  | 0  | 0   | 0  |
| 4  | 0  | 0  | 8  | 0 | 66 | 4  | 0  | 0 | 0  | 0  | 0  | 0  | 0  | 0  | 18 | 2  | 0   | 0  |
| 5  | 0  | 0  | 8  | 0 | 0  | 14 | 0  | 0 | 0  | 0  | 2  | 0  | 0  | 0  | 0  | 1  | 0   | 0  |
| 6  | 0  | 0  | 0  | 0 | 0  | 0  | 42 | 0 | 0  | 0  | 0  | 0  | 0  | 0  | 0  | 0  | 0   | 0  |
| 7  | 0  | 0  | 0  | 0 | 0  | 0  | 0  | 0 | 0  | 0  | 0  | 0  | 1  | 0  | 0  | 0  | 0   | 0  |
| 8  | 0  | 0  | 0  | 0 | 0  | 0  | 0  | 0 | 9  | 13 | 0  | 0  | 3  | 0  | 0  | 0  | 0   | 0  |
| 9  | 0  | 0  | 1  | 0 | 0  | 0  | 0  | 0 | 9  | 26 | 0  | 0  | 3  | 1  | 0  | 1  | 0   | 0  |
| 10 | 0  | 0  | 1  | 0 | 0  | 0  | 5  | 0 | 8  | 1  | 57 | 0  | 2  | 0  | 0  | 0  | 0   | 0  |
| 11 | 0  | 2  | 0  | 0 | 0  | 0  | 0  | 0 | 0  | 0  | 0  | 51 | 0  | 0  | 0  | 1  | 0   | 0  |
| 12 | 0  | 0  | 0  | 0 | 0  | 0  | 0  | 0 | 4  | 2  | 0  | 0  | 5  | 0  | 0  | 0  | 0   | 0  |
| 13 | 0  | 0  | 13 | 0 | 0  | 0  | 0  | 0 | 0  | 0  | 2  | 0  | 0  | 37 | 7  | 2  | 0   | 0  |
| 14 | 0  | 0  | 5  | 0 | 0  | 6  | 0  | 0 | 0  | 0  | 2  | 0  | 0  | 4  | 42 | 1  | 0   | 1  |
| 15 | 0  | 0  | 3  | 0 | 0  | 0  | 0  | 0 | 0  | 0  | 0  | 0  | 0  | 0  | 0  | 0  | 0   | 0  |
| 16 | 0  | 0  | 0  | 0 | 0  | 0  | 0  | 0 | 0  | 0  | 0  | 0  | 0  | 0  | 0  | 0  | 0   | 0  |
| 17 | 0  | 0  | 0  | 0 | 0  | 0  | 0  | 0 | 5  | 2  | 0  | 0  | 2  | 12 | 3  | 1  | 0   | 63 |

**Table S11.** Confusion matrix in percent for ESANet trained on D with input resolution of  $640 \times 480$  pixels after 1051/1500 epochs.

|    | 0  | 1  | 2  | 3  | 4  | 5  | 6  | 7  | 8  | 9  | 10 | 11 | 12 | 13 | 14 | 15 | 16 | 17 |
|----|----|----|----|----|----|----|----|----|----|----|----|----|----|----|----|----|----|----|
| 0  | 99 | 34 | 69 | 98 | 46 | 80 | 84 | 88 | 95 | 77 | 54 | 49 | 95 | 43 | 33 | 83 | 99 | 54 |
| 1  | 0  | 31 | 0  | 0  | 6  | 4  | 0  | 0  | 0  | 0  | 2  | 0  | 0  | 2  | 12 | 0  | 0  | 0  |
| 2  | 0  | 0  | 0  | 0  | 0  | 0  | 0  | 0  | 0  | 0  | 0  | 0  | 0  | 0  | 0  | 0  | 0  | 0  |
| 3  | 0  | 0  | 0  | 0  | 0  | 0  | 0  | 0  | 0  | 0  | 0  | 0  | 0  | 0  | 0  | 0  | 0  | 0  |
| 4  | 0  | 1  | 0  | 0  | 31 | 3  | 0  | 0  | 0  | 0  | 0  | 0  | 0  | 0  | 0  | 0  | 0  | 1  |
| 5  | 0  | 0  | 1  | 0  | 0  | 1  | 1  | 0  | 0  | 0  | 3  | 0  | 0  | 0  | 0  | 14 | 0  | 0  |
| 6  | 0  | 0  | 0  | 0  | 0  | 0  | 7  | 0  | 0  | 0  | 0  | 0  | 0  | 0  | 0  | 0  | 0  | 0  |
| 7  | 0  | 0  | 0  | 0  | 0  | 0  | 0  | 0  | 0  | 0  | 0  | 0  | 0  | 0  | 0  | 0  | 0  | 0  |
| 8  | 0  | 2  | 19 | 0  | 0  | 0  | 4  | 0  | 1  | 4  | 0  | 0  | 0  | 0  | 0  | 0  | 0  | 0  |
| 9  | 0  | 0  | 1  | 0  | 1  | 2  | 1  | 0  | 0  | 6  | 1  | 0  | 0  | 0  | 0  | 0  | 0  | 2  |
| 10 | 0  | 0  | 0  | 0  | 0  | 0  | 0  | 4  | 0  | 1  | 28 | 0  | 0  | 0  | 0  | 0  | 0  | 0  |
| 11 | 0  | 8  | 0  | 0  | 0  | 0  | 0  | 0  | 0  | 0  | 0  | 50 | 0  | 0  | 38 | 0  | 0  | 2  |
| 12 | 0  | 0  | 0  | 0  | 0  | 0  | 0  | 0  | 0  | 0  | 0  | 0  | 1  | 0  | 0  | 0  | 0  | 0  |
| 13 | 0  | 5  | 0  | 0  | 5  | 5  | 0  | 0  | 0  | 1  | 4  | 0  | 0  | 39 | 0  | 0  | 0  | 0  |
| 14 | 0  | 12 | 0  | 0  | 7  | 1  | 0  | 0  | 0  | 0  | 2  | 0  | 0  | 6  | 15 | 0  | 0  | 4  |
| 15 | 0  | 0  | 6  | 0  | 0  | 0  | 0  | 0  | 0  | 0  | 0  | 0  | 0  | 0  | 0  | 0  | 0  | 0  |
| 16 | 0  | 0  | 0  | 0  | 0  | 0  | 0  | 0  | 0  | 0  | 0  | 0  | 0  | 0  | 0  | 2  | 0  | 0  |
| 17 | 0  | 2  | 0  | 0  | 0  | 0  | 0  | 2  | 1  | 4  | 0  | 0  | 0  | 5  | 0  | 0  | 0  | 30 |
